# Supplementary material
Source: HighWire-hosted journal article supplement (http://www.ajnr.org/highwire/filestream/52726/field_highwire_adjunct_files/0/15-00578.pdf)
Supplement: 15-00578.pdf [file 15-00578.pdf]

**On-line Table: Sample characteristics<sup>a</sup>**

| Clinical Information                                              | Controls (n = 26) | DM-MCI (n = 20) | DM-NC (n = 22) | F/ $\chi^2$ /t Value <sup>b</sup> | P Value <sup>c</sup> |
|-------------------------------------------------------------------|-------------------|-----------------|----------------|-----------------------------------|----------------------|
| Sex (female/male)                                                 | 17:9              | 12:8            | 15:7           | 0.316 <sup>d</sup>                | .854 <sup>d</sup>    |
| Age (yr)                                                          | 59.88 ± 6.17      | 62.75 ± 5.93    | 59.05 ± 6.22   | 2.102 <sup>e</sup>                | .130 <sup>e</sup>    |
| Formal education (yr)                                             | 9.92 ± 3.35       | 11.00 ± 3.54    | 11.64 ± 3.32   | 1.570 <sup>e</sup>                | .216 <sup>e</sup>    |
| Hypertension <sup>f</sup>                                         | 3 (11.5)          | 6 (30)          | 5 (22.7)       | 2.448 <sup>d</sup>                | .294 <sup>d</sup>    |
| Hyperlipidemia <sup>g</sup>                                       | 2 (7.7)           | 3 (15)          | 5 (22.7)       | 2.150 <sup>d</sup>                | .341 <sup>d</sup>    |
| Body mass index (kg/m <sup>2</sup> )                              | 23.49 ± 2.04      | 23.83 ± 3.27    | 22.39 ± 2.51   | 1.257 <sup>e</sup>                | .291 <sup>e</sup>    |
| Age DM diagnosed (yr)                                             | —                 | 53.65 ± 7.86    | 53.82 ± 5.72   | 0.08                              | .936                 |
| Diabetes duration (yr)                                            | —                 | 9.02 ± 7.95     | 5.28 ± 4.52    | 1.894                             | .066                 |
| Family history <sup>h</sup>                                       | —                 | 5 (25)          | 8 (36.4)       | 0.633 <sup>d</sup>                | .426 <sup>d</sup>    |
| Insulin use                                                       | —                 | 3 (15)          | 1 (4.5)        | 1.329 <sup>d</sup>                | .249 <sup>d</sup>    |
| Complication (peripheral nerve and vascular lesions; retinopathy) | —                 | 4 (20)          | 1 (4.5)        | 2.386 <sup>d</sup>                | .122 <sup>d</sup>    |
| Glycosylated hemoglobin A1c (%)                                   | 5.39 ± 0.41       | 8.22 ± 1.60     | 6.98 ± 1.26    | 2.789                             | .008                 |
| Glycosylated hemoglobin A1c (mmol/mol)                            | 35.63 ± 4.47      | 66.20 ± 17.53   | 52.68 ± 13.85  | 2.785                             | .008                 |
| Fasting glucose (mmol/L)                                          | 5.22 ± 0.65       | 9.94 ± 2.07     | 10.29 ± 3.35   | 0.406                             | .687                 |
| Postprandial glucose                                              | —                 | 14.34 ± 4.78    | 14.99 ± 4.61   | 0.451                             | .654                 |
| Montreal Cognitive Assessment                                     | 28.73 ± 1.08      | 25.2 ± 1.20     | 28.09 ± 0.68   | 9.727                             | <.01                 |
| Mini-Mental State Examination                                     | 28.19 ± 1.06      | 25.3 ± 2.05     | 28.55 ± 0.96   | 6.655                             | <.01                 |
| Auditory Verbal Learning Test                                     | —                 | 32.1 ± 6.1      | 42.6 ± 5.7     | 4.971                             | <.01                 |
| Activities of Daily Living (Barthel index)                        | 100 ± 0           | 99.75 ± 1.19    | 99.41 ± 2.77   | 0.513                             | .611                 |
| Hachinski Ischemic Score                                          | 0.88 ± 0.71       | 2 ± 1.03        | 2.09 ± 1.06    | 0.281                             | .780                 |

**Note:**—DM indicates diabetes mellitus.

<sup>a</sup> Data are expressed as mean ± SD or percentages unless otherwise indicated.

<sup>b</sup> F,  $\chi^2$ , and t are reported for ANOVA, the Pearson  $\chi^2$  test, and Student t test, respectively.

<sup>c</sup> All P values, except where noted, were obtained using a 2-tailed Student t test between the DM-MCI and the DM-NC groups.

<sup>d</sup> P values were obtained using the Pearson  $\chi^2$  test (2-sided).

<sup>e</sup> P values were obtained using ANOVA.

<sup>f</sup> For hypertension, systolic pressure ranged between 140 and 159 mm Hg, or diastolic pressure ranged between 90 and 99 mm Hg. Patients with moderate and severe hypertension were excluded.

<sup>g</sup> Hyperlipidemia was evaluated as a cholesterol level of >5.7 mmol/L or a triglyceride level of >1.7 mmol/L.

<sup>h</sup> Family history accounts for immediate family members who had T2DM within 3 generations.

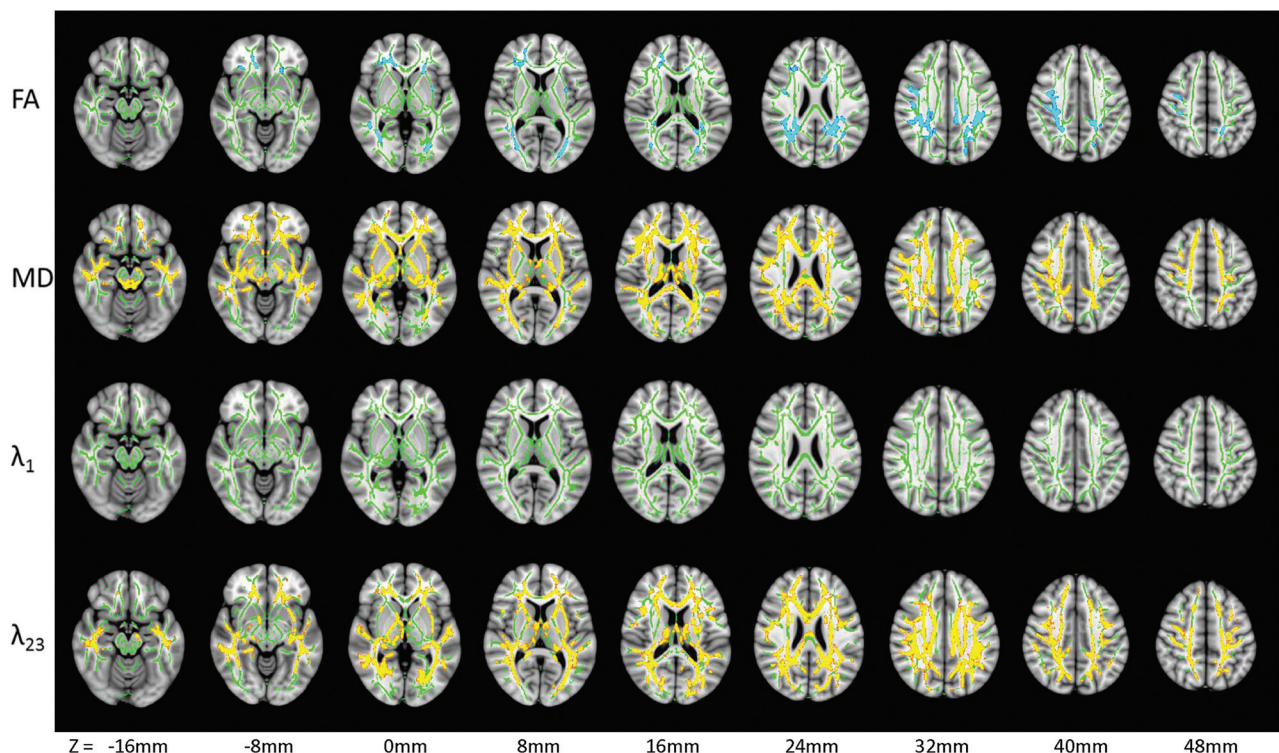

**ON-LINE FIG 1.** Differences in FA, MD, axial diffusivity ( $\lambda_1$ ), and radial diffusivity ( $\lambda_{23}$ ) between the DM-MCI and the DM-NC groups. All results were obtained from an FSL TBSS analysis. A Montreal Neurological Institute 152 T1 1-mm brain standard space was used as a background image (gray-scale). Green indicates the FA skeleton with a threshold of 0.2 highlighting the fibers used in the comparison; blue–light-blue (thickened for better visibility), regions with decreased FA, MD,  $\lambda_1$ , or  $\lambda_{23}$ ; and red–yellow (thickened for better visibility), regions with increased FA, MD,  $\lambda_1$ , or  $\lambda_{23}$ . Three selected sections from this figure are shown in Fig 2.

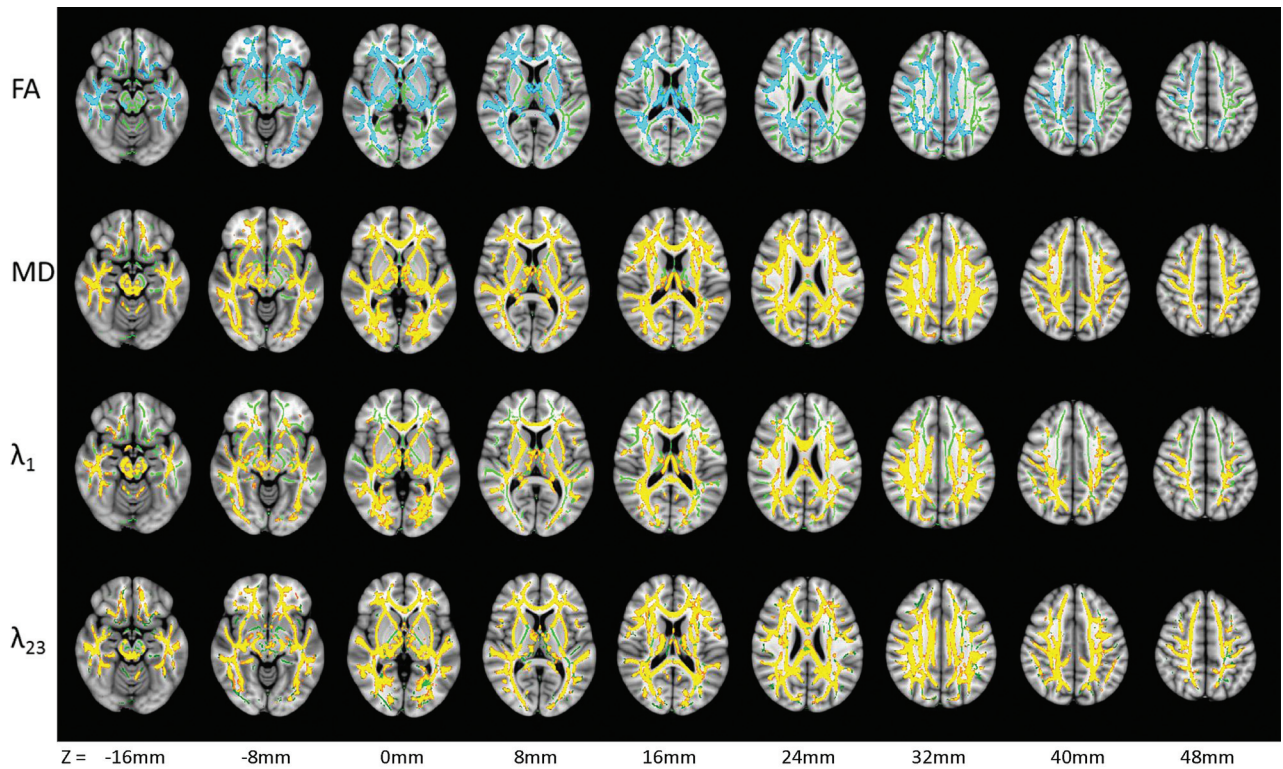

**ON-LINE FIG 2.** Group differences in FA, MD, axial diffusivity ( $\lambda_1$ ), and radial diffusivity ( $\lambda_{23}$ ) between the DM-MCI and the HC groups. All other details are the same as in the legend of On-line Fig 1. Three selected sections from this figure are shown in Fig 3.

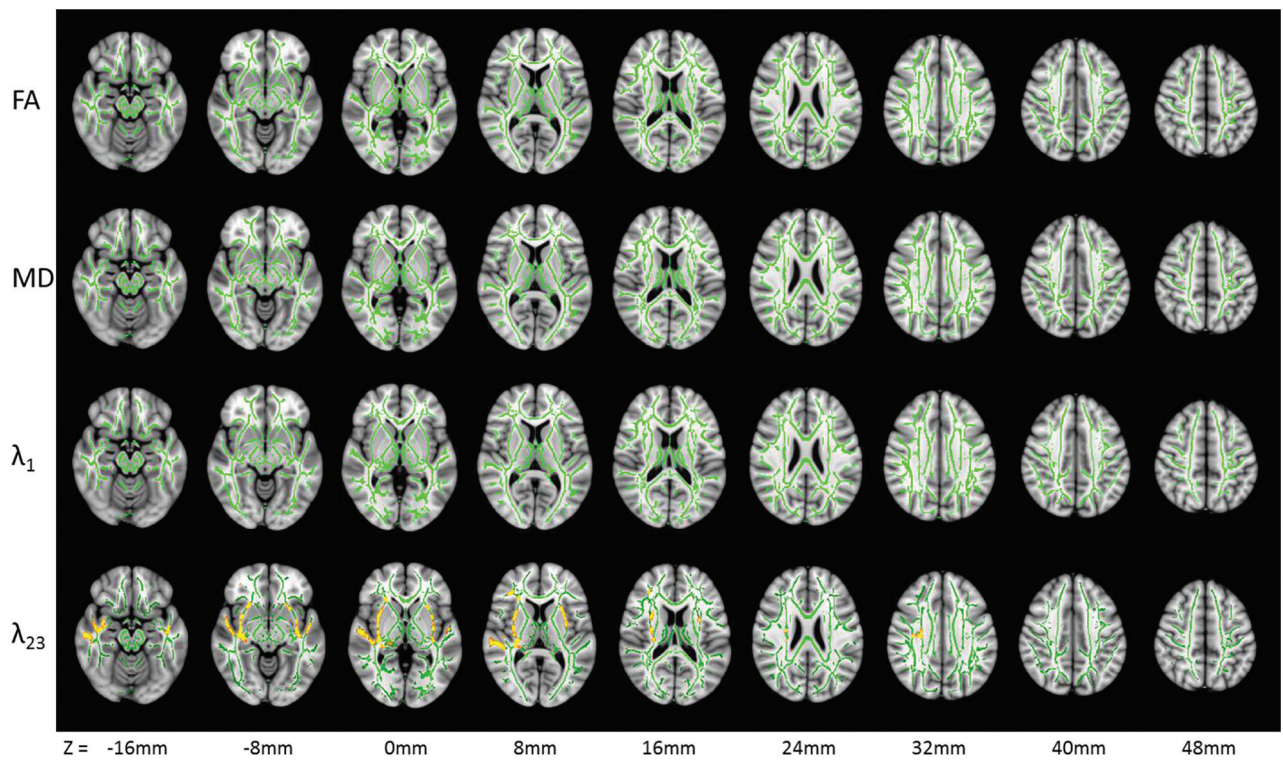

**ON-LINE FIG 3.** Group differences in FA, MD, axial diffusivity ( $\lambda_1$ ), and radial diffusivity ( $\lambda_{23}$ ) between the DM-NC and the HC groups. All other details are the same as in the legend of On-line Fig 1. Three selected sections from this figure are shown in Fig 4.
